# Supplementary material
Source: Royal Society of Chemistry journal article supplement (doi:10.1039/d6ta00159a)
Supplement: d6ta00159a1.pdf [file d6ta00159a1.pdf]

## Supporting Information

### **A transition-metal-and-solvent-free dual-graphite battery**

Minh Canh Vu, Hrishikesh S. Srinivasan, Priyadarshini Mirmira, Emily S. Doyle, Reginaldo J. Gomes, and  
Chibueze V. Amanchukwu\*

*Pritzker School of Molecular Engineering, University of Chicago, Chicago, IL 60637, USA.*

\*Corresponding author: Chibueze V. Amanchukwu. E-mail: [chibueze@uchicago.edu](mailto:chibueze@uchicago.edu).

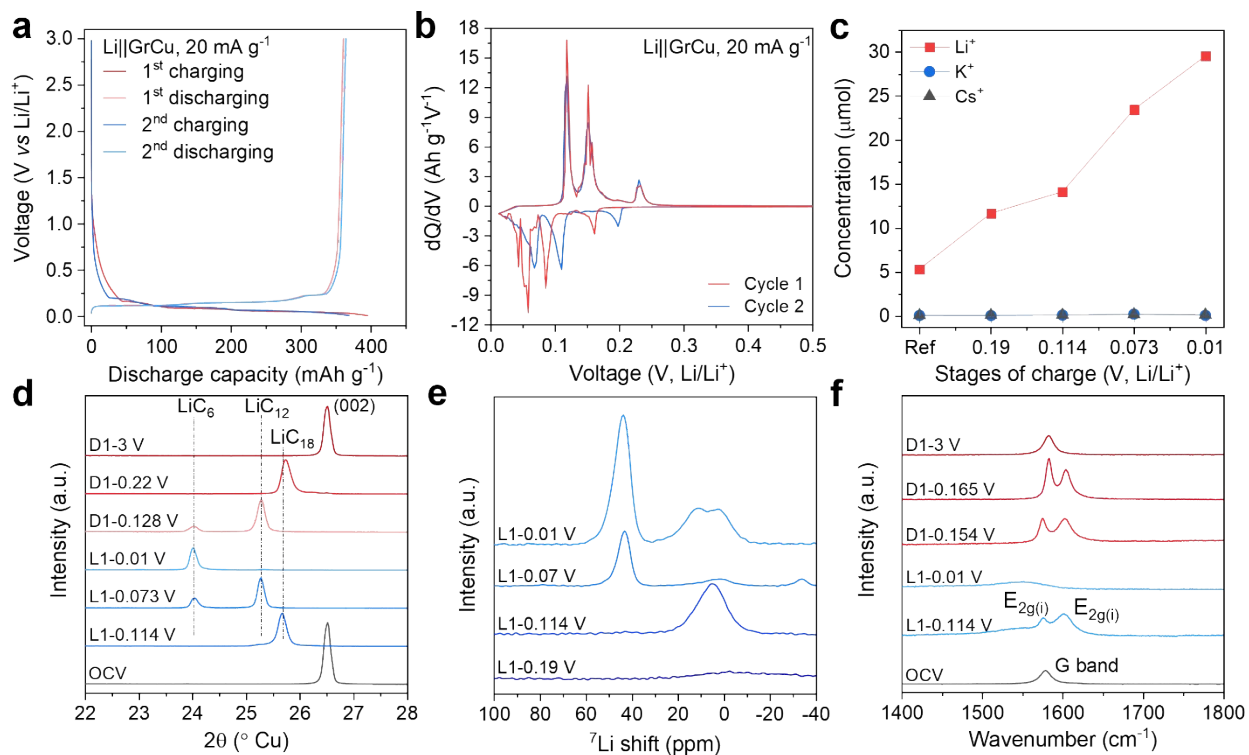

**Figure S1.** (a) Charge-discharge voltage profiles, (b)  $dQ/dV$  curves of Li||GrCu cells using 3M  $\text{Li}_{0.3}\text{K}_{0.35}\text{Cs}_{0.35}\text{FSA/FEC-FEMC}$  electrolyte (LE) at  $20 \text{ mA g}^{-1}$ . (c) Cation concentrations in the intercalated GrCu electrodes at different states of charge from the Li||GrCu cells using LE at  $20 \text{ mA g}^{-1}$  obtained using ICP-MS. (d) Ex-situ XRD pattern, (e) solid-state NMR, and (f) Raman spectra of the intercalated GrCu electrodes at different stages of charge from the Li||GrCu cells using LE at  $20 \text{ mA g}^{-1}$ , respectively.

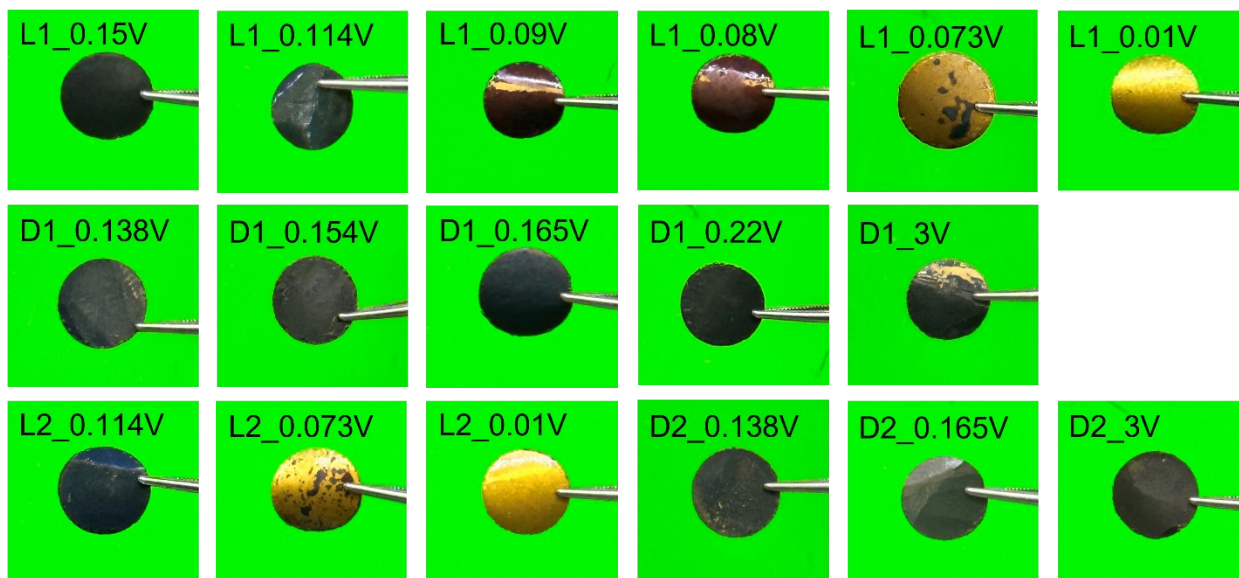

**Figure S2.** Digital photos of the GrCu electrodes from the Li||GrCu cells at different stages of charge/discharge at  $20 \text{ mA g}^{-1}$  and  $80^\circ\text{C}$  using the molten salt electrolyte (MSE). The names of the samples are represented at the left corner of the images, where L or D means Lithiation (charge) or Delithiation (discharge), followed by the cycle index, and the number after “\_” represents the stages of charge/discharge.

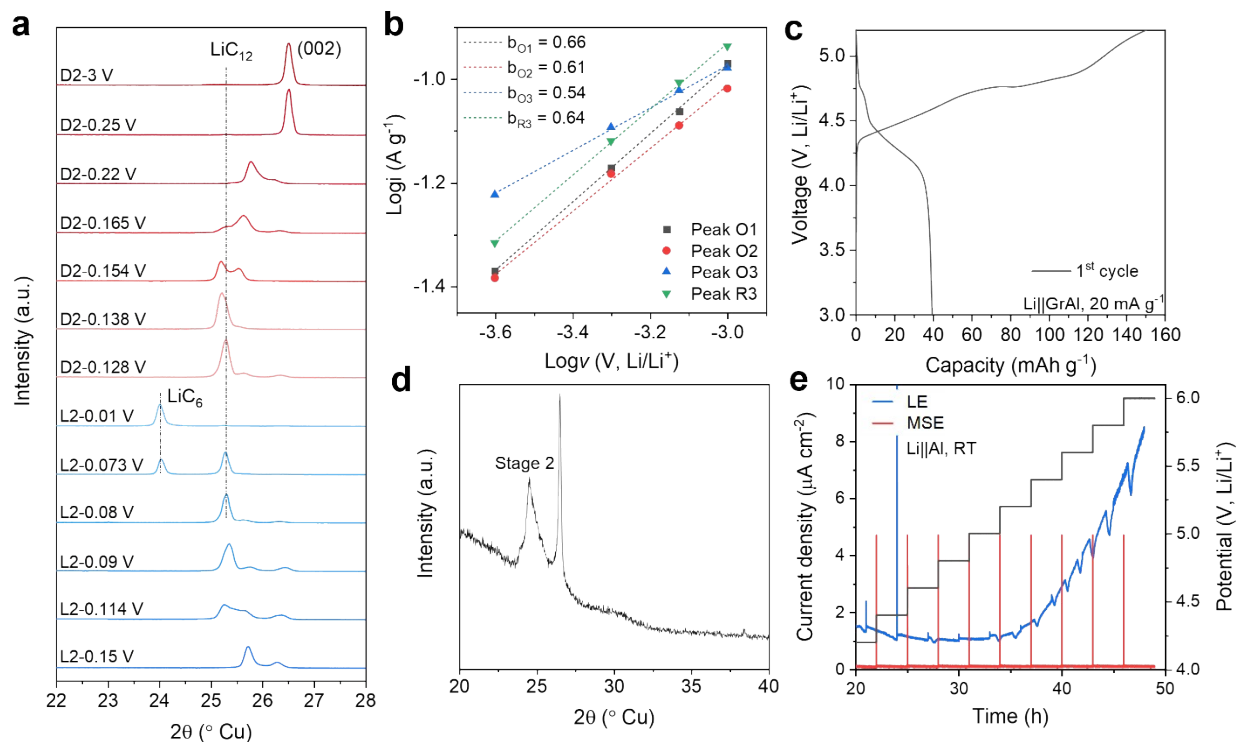

**Figure S3.** (a) Ex-situ XRD pattern of the intercalated GrCu electrodes at different stages of charge from the Li||GrCu cells using Li<sub>0.3</sub>K<sub>0.35</sub>CS<sub>0.35</sub>FSA MSE at 20 mA g<sup>-1</sup>. (b) log*i* versus log*v* to determine *b* values for graphite cathodes. (c) Charge-discharge voltage profile of Li||GrAl cells using LE at 20 mA g<sup>-1</sup>. (d) Ex-situ XRD pattern of the GrAl electrodes after being charged to 5.2V using LE at 20 mA g<sup>-1</sup>. (e) Potentiostatic hold from 3-6V (vs. Li/Li<sup>+</sup>) of Li||Al cells using MSE (red line) and LE (blue line) with 0.2V steps.

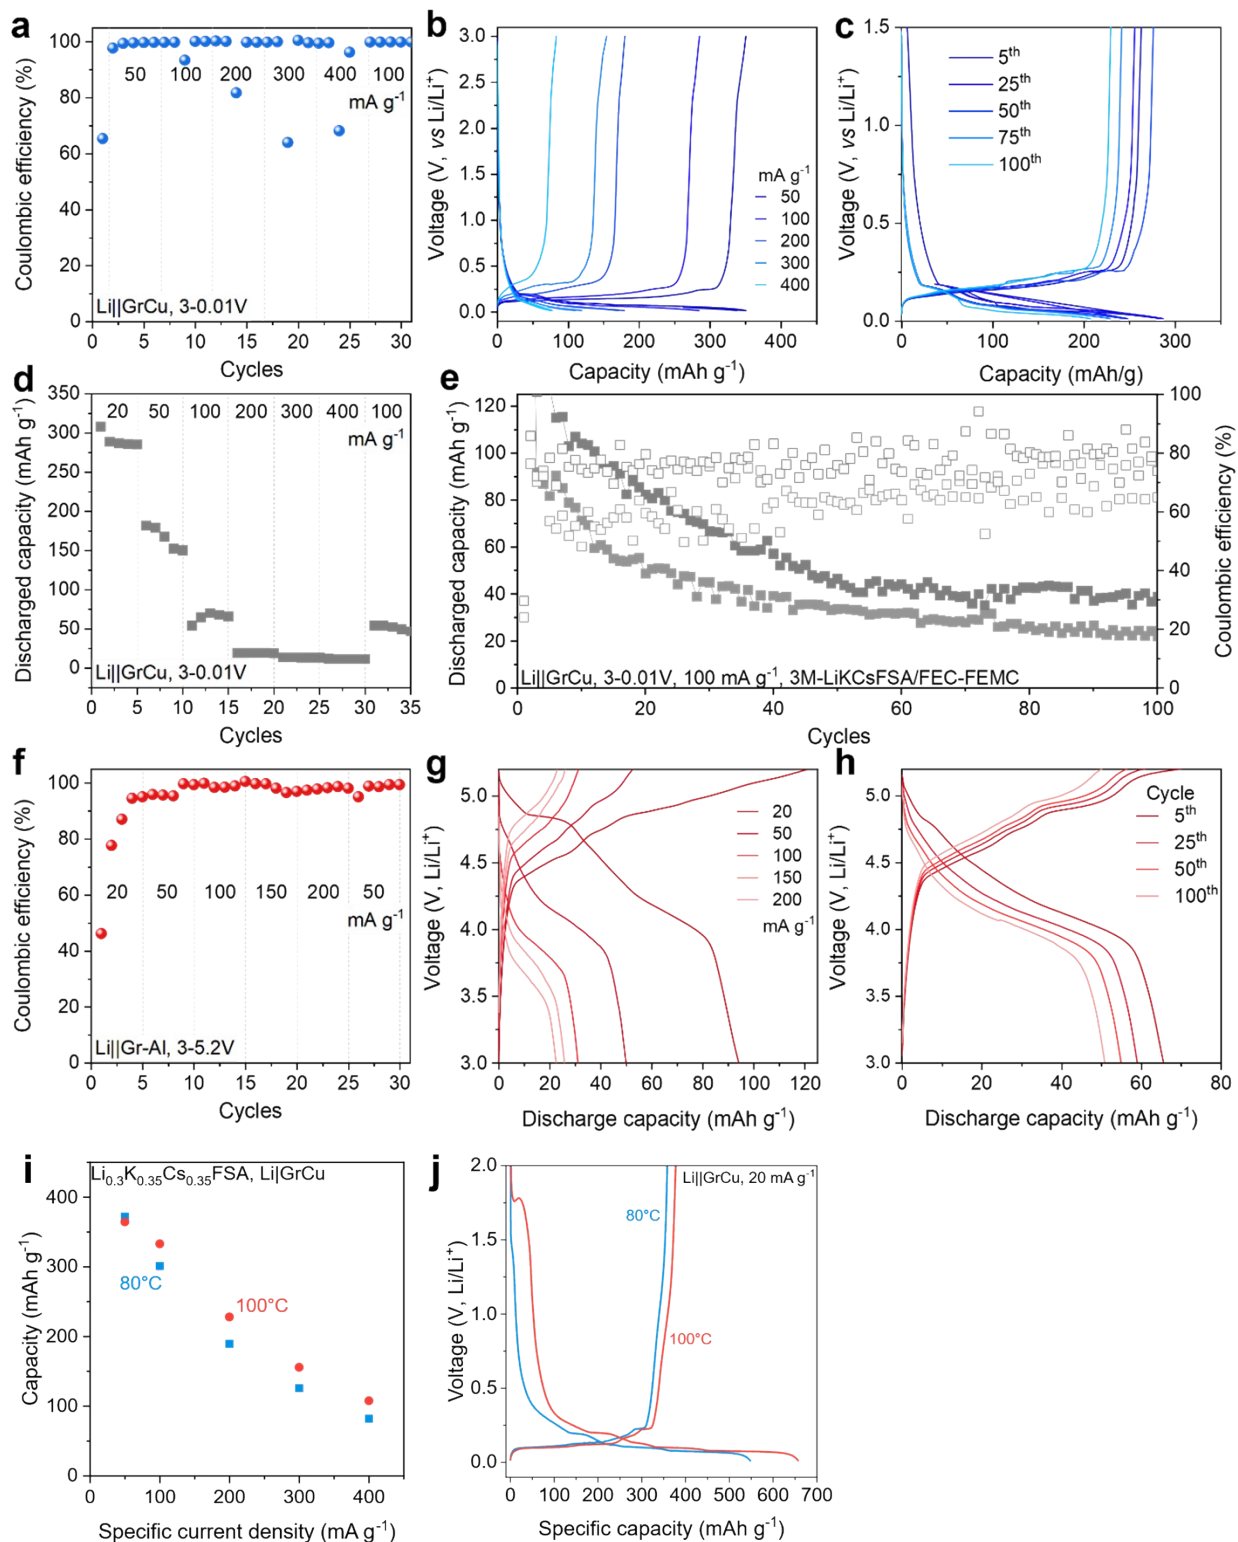

**Figure S4.** (a) Coulombic efficiency of the Li||GrCu cells using MSE at different current densities in the voltage range of 0.01-3V (vs. Li/Li<sup>+</sup>). Selected voltage profiles of the Li||GrCu cells using MSE at (b) different current densities, and (c) different cycles at 100 mA g<sup>-1</sup>. (d) Discharge capacities of the Li||GrCu

cells using LE at different current densities in the voltage range of 0.01-3V (vs. Li/Li<sup>+</sup>). (e) Long-term cycling of Li||GrCu cells using LE at 100 mA g<sup>-1</sup> in the voltage range of 0.01-3V (vs. Li/Li<sup>+</sup>). (f) Coulombic efficiency of the Li||GrAl cells using MSE at different current densities in the voltage range of 3-5.2V (vs. Li/Li<sup>+</sup>). Selected voltage profiles of the Li||GrAl cells using MSE at (g) different current densities, and (h) different cycles at 50 mA g<sup>-1</sup>. (i) Discharge capacities of the Li||GrCu cells using MSE at different temperatures (80 °C and 100 °C) in the voltage range of 0.01-3V (vs. Li/Li<sup>+</sup>). (j) Voltage profiles of Li||GrCu cells using MSE at 80°C and 100°C at 20 mA g<sup>-1</sup>.

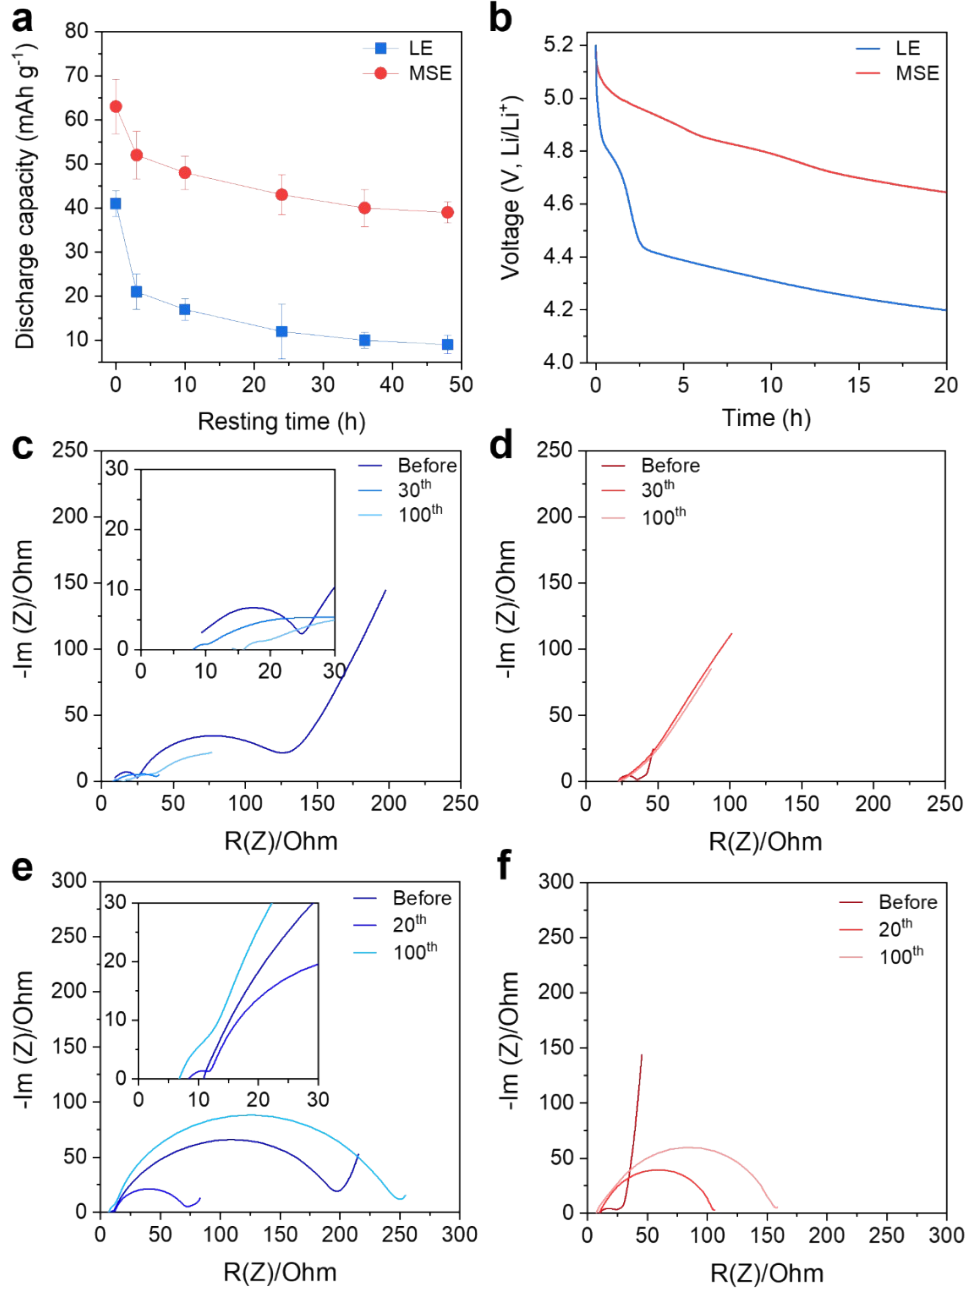

**Figure S5.** Evolution of (a) discharged capacity and (b) Potential as a function of time of the Li||GrAl cells using MSE and LE. Nyquist plots of the cycled GrCu and GrAl electrodes using (c, e) LE, and (d, f) MSE, respectively.

The rate of self-discharge ( $r$ ) can be calculated from the following equation:

$$r = \frac{C_t - C_{t'}}{C_t(t - t')} \times 100\% \quad (\text{S1})$$

where  $C_t$  and  $C_{t'}$  represent the discharge capacities after resting for  $t$  and  $t'$ , respectively.

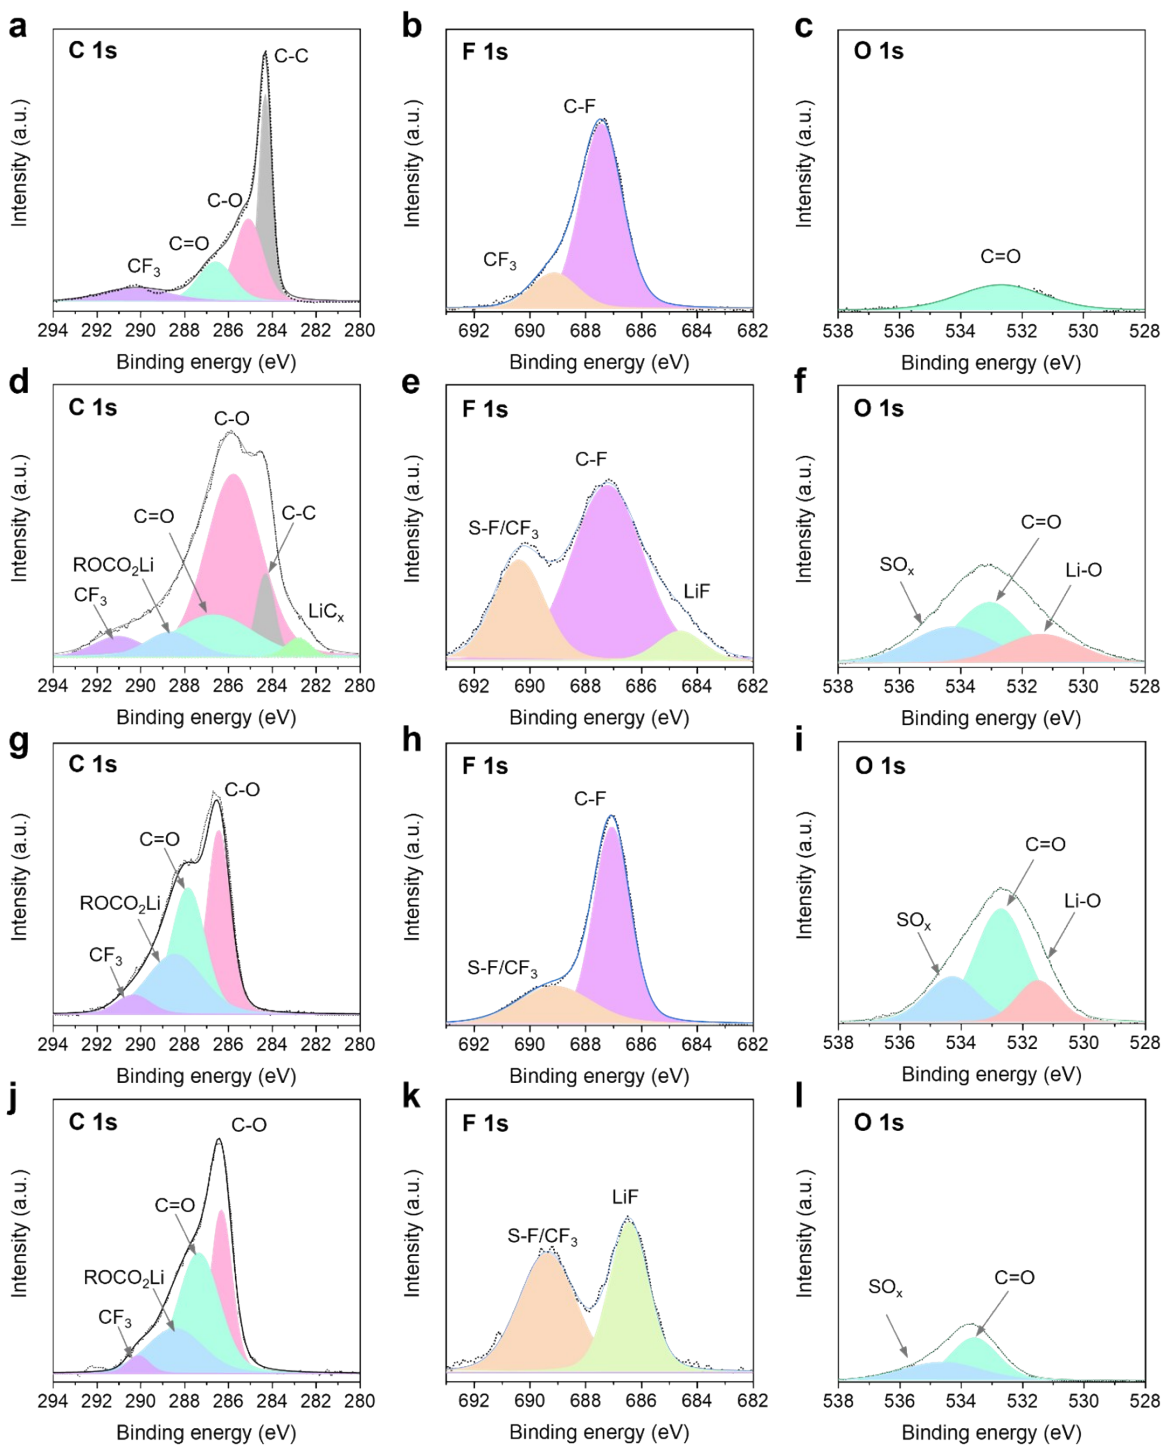

**Figure S6.** High-resolution XPS spectra of (a-c) C 1s, F 1s, and O 1s of the pristine GrCu electrode, respectively. (d-f) C 1s, F 1s, and O 1s of the GrCu electrode from Li||GrCu cells using LE after formation cycles, respectively. (g-i) C 1s, F 1s, and O 1s of the GrCu electrode from Li||GrCu cells using LE after 100 cycles of lithiation/delithiation, respectively. (j-l) C 1s, F 1s, and O 1s of the GrCu electrode from Li||GrCu cells using MSE after formation cycles, respectively.

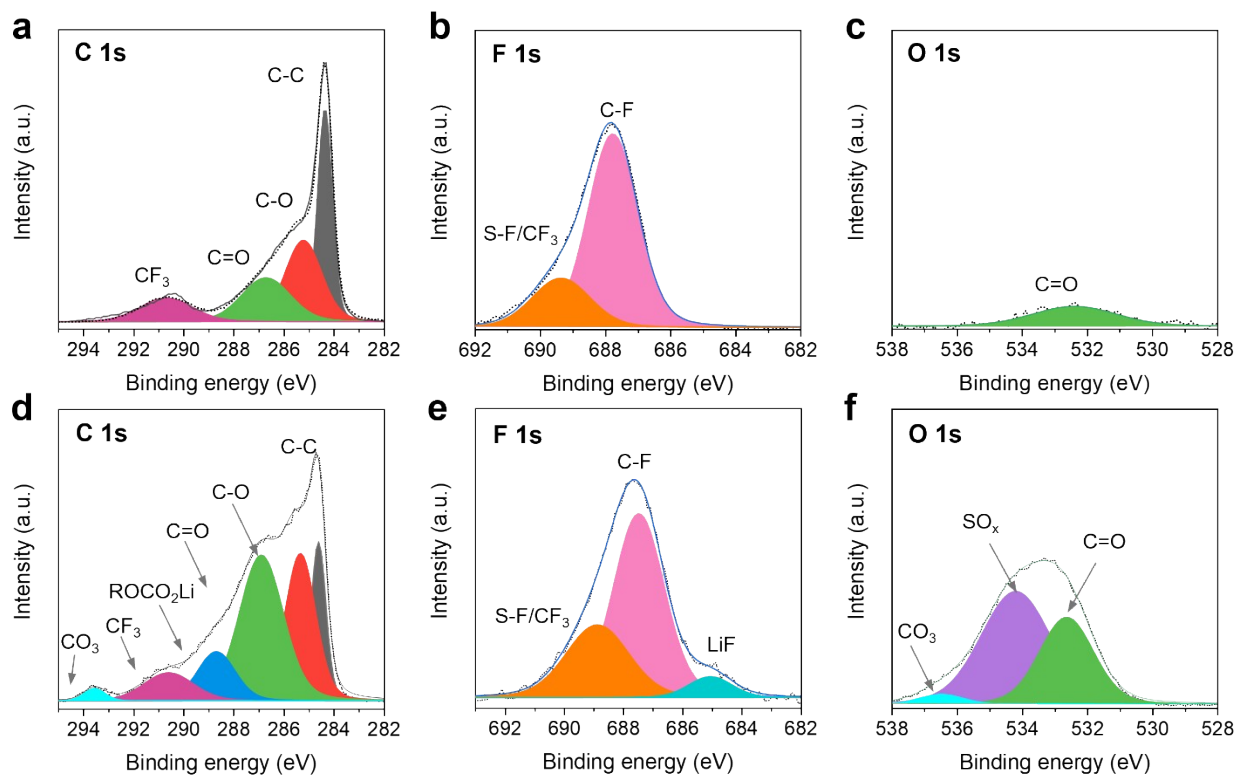

**Figure S7.** High-resolution XPS spectra of (a) C 1s, (b) F 1s, and (c) O 1s of the pristine GrAl electrode, respectively. (d) C 1s, (e) F 1s, and (f) O 1s of the GrAl electrode from Li||GrAl cells using LE after 100 cycles of FSA<sup>-</sup> anion intercalation/de-intercalation, respectively.

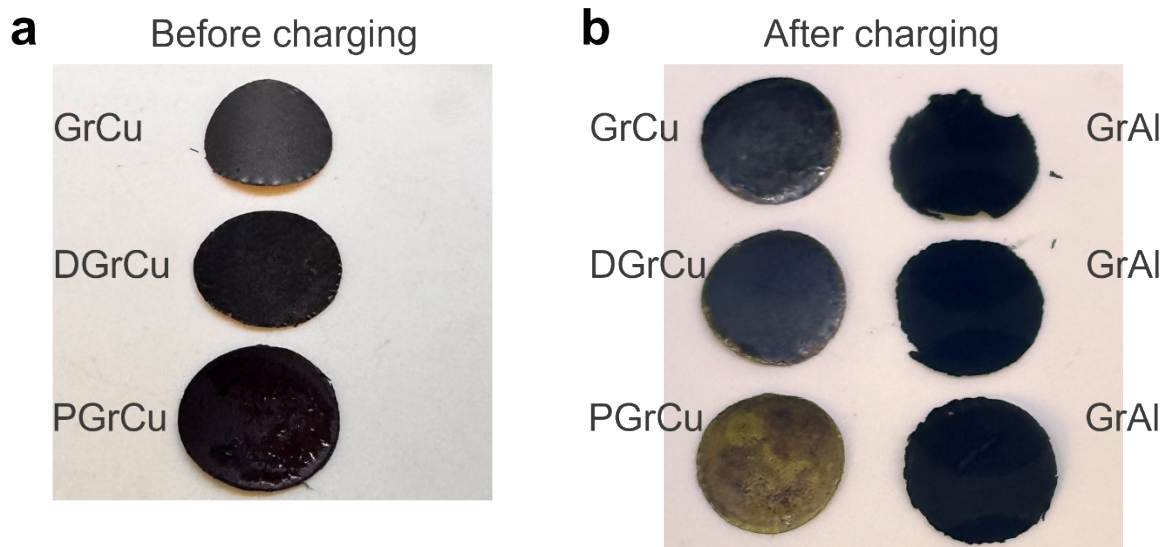

**Figure S8.** Digital photos of (a) the precycled GrCu before being charged to 5.2V (vs. Li/Li<sup>+</sup>), and (b) the precycled GrCu (left-column), and GrAl electrodes (right-column) after being charged to 5.2V (vs. Li/Li<sup>+</sup>) using MSE. Before charging, the anode GrCu electrodes underwent 3 formation cycles and then charged to different stages using the Li||GrCu cells including (1) charging to 0.09 V for partially lithiated graphite (PGrCu), (2) discharging to 3 V for fully delithiated graphite (DGrCu) using MSE.

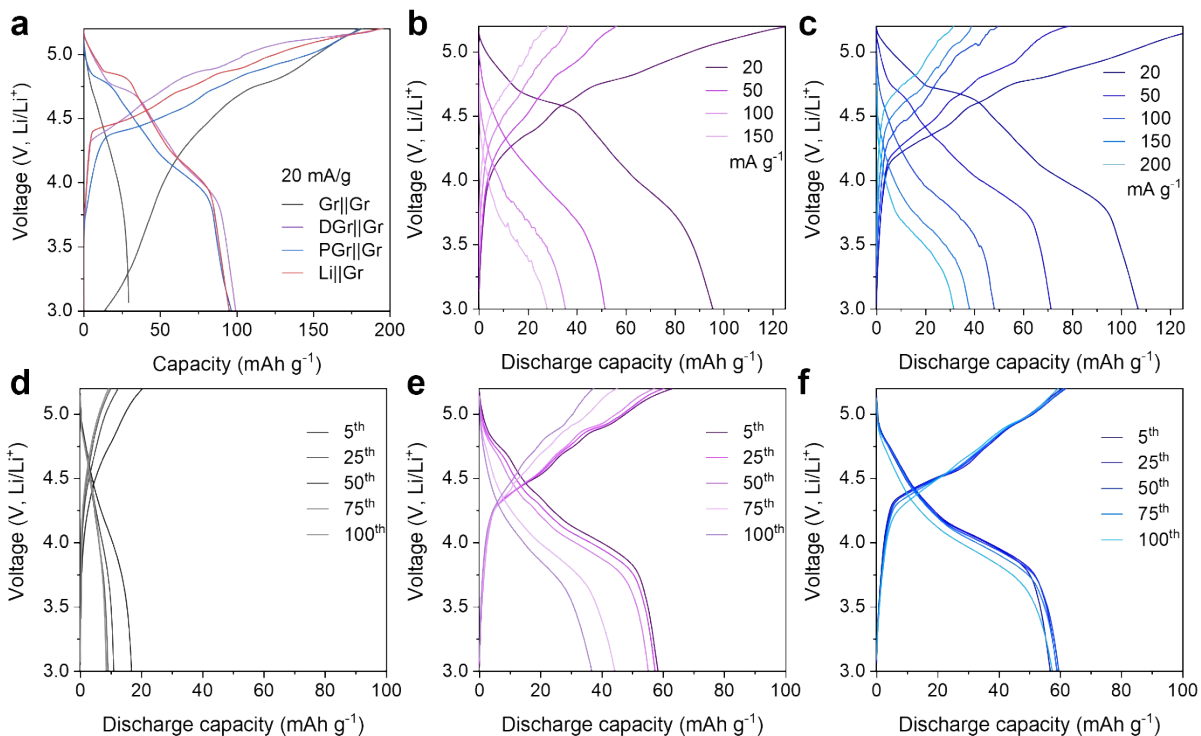

**Figure S9.** (a) Voltage profiles of the first cycle of different types of full-cell DGB at 20 mA g<sup>-1</sup> using MSE in the voltage range of 3-5.2V (vs. Li/Li<sup>+</sup>). (b-c) Charge-discharge voltage profiles of (b) DGr||Gr cells and (c) PGr||Gr cells using MSE at different current densities in the voltage range of 3-5.2V (vs. Li/Li<sup>+</sup>). (d-f) Selected charge-discharge voltage profiles of (d) Gr||Gr, (e) DGr||Gr cells, and (f) PGr||Gr cells using MSE at different cycles at 50 mA g<sup>-1</sup> in the voltage range of 3-5.2V (vs. Li/Li<sup>+</sup>).

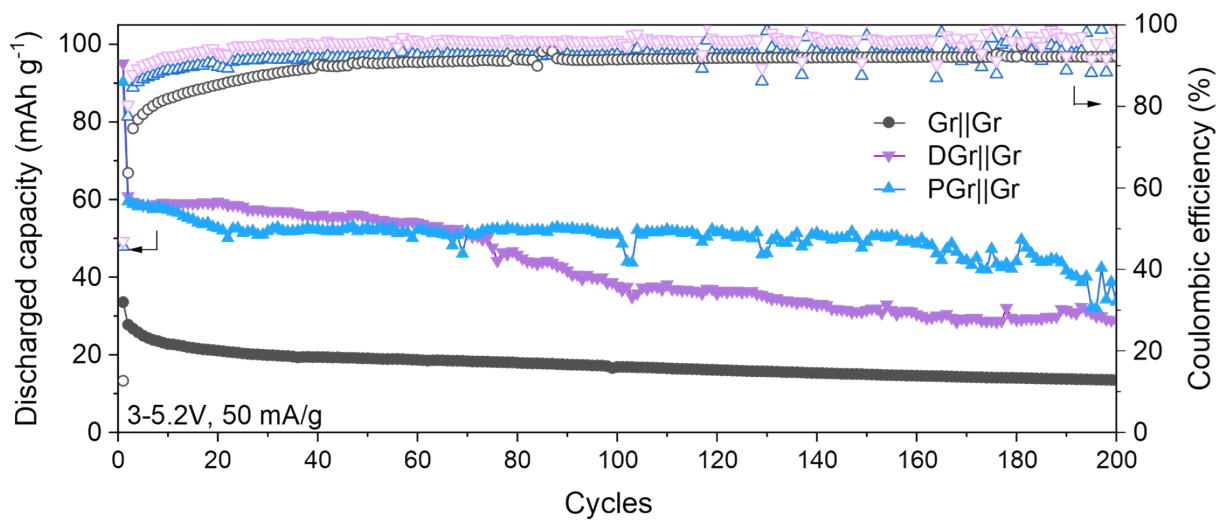

**Figure S10.** Long-term cycling of the different types of DGB cells using MSE at 50 mA g<sup>-1</sup> in the voltage range of 3-5.2V (vs. Li/Li<sup>+</sup>) up to 200 cycles.

**Table S1.** Overview of the measurement data ( $2\theta$  values for the most dominant peaks) and calculated parameters [most dominant stage index ( $n$ ), periodic repeat distance ( $I_c$ ), gallery height ( $d_i$ ), gallery expansion ( $\Delta d$ )] for the operando X-ray diffraction study of FSA-anion intercalation/de-intercalation into/from graphite.

| Voltage (V) | $2\theta(00n+1)$ (degree) | $2\theta(00n+2)$ (degree) | $d(00n+2)/d(00n+1)$ | Stage, $n$ | $I_c/\text{\AA}$ | $d_i/\text{\AA}$ | $\Delta d/\text{\AA}$ | $\Delta c/\%$ |
|-------------|---------------------------|---------------------------|---------------------|------------|------------------|------------------|-----------------------|---------------|
| 4.65        | 23.74                     | 30.01                     | 1.259               | 3          | 14.870           | 8.160            | 4.805                 | 47.744        |
| 4.75        | 23.74                     | 30.01                     | 1.259               | 3          | 14.870           | 8.160            | 4.805                 | 47.744        |
|             | 24.1                      | 31.05                     | 1.282               | 2          | 11.507           | 8.152            | 4.797                 | 71.493        |
| 4.95        | 24.1                      | 31.05                     | 1.282               | 2          | 11.507           | 8.152            | 4.797                 | 71.493        |
|             | 22.4                      | 34                        | 1.505               | 1          | 7.901            | 7.901            | 4.546                 | 135.496       |
| 5.1         | 22.4                      | 34                        | 1.505               | 1          | 7.901            | 7.901            | 4.546                 | 135.496       |
| 5.2         | 22.4                      | 34                        | 1.505               | 1          | 7.901            | 7.901            | 4.546                 | 135.496       |
